# Supplementary material
Source: publisher site journal article supplement (https://www.dovepress.com/get_supplementary_file.php?f=supplementary_file_68909_4.pdf)
Supplement: Supplementary file 1 [file get_supplementary_file.php]

Table S4: provisional BCS classifications of 185 drugs with the various in-silico methods

| Drug                       | BCS Classification based on                  |                                                                                      |                                                                                 |                                               |                                                                                       |                                              |                                                                                      |                                                    |                                                                                            |                                                                                       |
|----------------------------|----------------------------------------------|--------------------------------------------------------------------------------------|---------------------------------------------------------------------------------|-----------------------------------------------|---------------------------------------------------------------------------------------|----------------------------------------------|--------------------------------------------------------------------------------------|----------------------------------------------------|--------------------------------------------------------------------------------------------|---------------------------------------------------------------------------------------|
|                            | CLogP (BioLoom 5.0) and reference solubility | CLogP (BioLoom 5.0) and <i>in silico</i> solubility using experimental melting point | CLogP (BioLoom 5.0) and <i>in silico</i> solubility using average melting point | CLogP (ChemDraw 8.0) and reference solubility | CLogP (ChemDraw 8.0) and <i>in silico</i> solubility using experimental melting point | AlogP (MOE 2004.03) and reference solubility | AlogP (MOE 2004.03) and <i>in silico</i> solubility using experimental melting point | KlogP (Molecular Formula) and reference solubility | KlogP (Molecular Formula) and <i>in silico</i> solubility using experimental melting point | KlogP (Molecular Formula) and <i>in silico</i> solubility using average melting point |
| abacavir sulfate           | 3                                            | 3                                                                                    | 3                                                                               | 3                                             | 3                                                                                     | 3                                            | 4                                                                                    | 3                                                  | 4                                                                                          | 4                                                                                     |
| aceclofenac                | 2                                            | 2                                                                                    | 2                                                                               | 2                                             | 2                                                                                     | 2                                            | 2                                                                                    | 2                                                  | 2                                                                                          | 2                                                                                     |
| acetaminophen <sup>b</sup> | 4                                            | 3                                                                                    | 3                                                                               | 4                                             | 3                                                                                     | 4                                            | 4                                                                                    | 4                                                  | 4                                                                                          | 4                                                                                     |
| acyclovir <sup>a,c</sup>   | 4                                            | 3                                                                                    | 3                                                                               | 4                                             | 3                                                                                     | 4                                            | 3                                                                                    | 4                                                  | 3                                                                                          | 3                                                                                     |
| albendazole                | 2                                            | 2                                                                                    | 2                                                                               | 2                                             | 2                                                                                     | 2                                            | 2                                                                                    | 4                                                  | 4                                                                                          | 4                                                                                     |
| alibendol                  | 1                                            | 1                                                                                    | 1                                                                               | 1                                             | 1                                                                                     | 3                                            | 3                                                                                    | 3                                                  | 3                                                                                          | 3                                                                                     |
| alprazolam                 | 1                                            | 1                                                                                    | 1                                                                               | 1                                             | 1                                                                                     | 1                                            | 1                                                                                    | 1                                                  | 1                                                                                          | 1                                                                                     |
| amiloride hydrochloride    | 3                                            | 3                                                                                    | 3                                                                               | 3                                             | 3                                                                                     | 3                                            | 3                                                                                    | 3                                                  | 3                                                                                          | 3                                                                                     |
| anastrozole                | 3                                            | 3                                                                                    | 3                                                                               | 3                                             | 3                                                                                     | 1                                            | 1                                                                                    | 1                                                  | 1                                                                                          | 1                                                                                     |
| atenolol                   | 3                                            | 3                                                                                    | 3                                                                               | 3                                             | 3                                                                                     | 3                                            | 3                                                                                    | 3                                                  | 3                                                                                          | 3                                                                                     |
| atropine sulfate           | 3                                            | 3                                                                                    | 3                                                                               | 3                                             | 3                                                                                     | 1                                            | 1                                                                                    | 1                                                  | 1                                                                                          | 1                                                                                     |
| azithromycin hydrate       | 2                                            | 2                                                                                    | 2                                                                               |                                               |                                                                                       | 2                                            | 2                                                                                    | 2                                                  | 2                                                                                          | 2                                                                                     |







|                                    |   |   |   |   |   |   |   |   |   |   |
|------------------------------------|---|---|---|---|---|---|---|---|---|---|
| imatinib<br>mesylate               | 2 | 2 | 2 | 2 | 2 | 2 | 2 | 2 | 2 | 2 |
| imidapril<br>hydrochloride         | 1 | 1 | 1 | 1 | 1 | 3 | 3 | 3 | 3 | 3 |
| indapamide                         | 1 | 1 | 1 | 1 | 1 | 1 | 1 | 1 | 1 | 1 |
| indinavir sulfate                  | 2 | 2 | 2 | 2 | 2 | 2 | 2 | 2 | 2 | 2 |
| irbesartan                         | 2 | 2 | 2 | 2 | 2 | 2 | 2 | 2 | 2 | 2 |
| isoniazid                          | 3 | 3 | 3 | 3 | 3 | 3 | 3 | 3 | 3 | 3 |
| isotretinoin                       | 2 | 2 | 2 | 2 | 2 | 2 | 2 | 2 | 2 | 2 |
| itraconazole                       | 2 | 2 | 2 | 2 | 2 | 2 | 2 | 2 | 2 | 2 |
| ketoprofen                         | 2 | 2 | 2 | 2 | 2 | 2 | 2 | 2 | 1 | 2 |
| ketotifen<br>fumarate              | 1 | 1 | 1 | 1 | 1 | 1 | 1 | 1 | 1 | 1 |
| lamivudine                         | 3 | 3 | 3 | 3 | 3 | 3 | 3 | 3 | 3 | 3 |
| l-carbocysteine                    | 4 | 3 | 3 | 4 | 3 | 4 | 3 | 4 | 3 | 3 |
| letrozole                          | 3 | 3 | 3 | 3 | 3 | 1 | 1 | 1 | 1 | 1 |
| levamisole<br>hydrochloride        | 1 | 1 | 2 | 1 | 1 | 1 | 1 | 1 | 1 | 2 |
| levetiracetam                      | 3 | 3 | 3 | 3 | 3 | 3 | 3 | 3 | 3 | 3 |
| levodopa <sup>a,c</sup>            | 4 | 3 | 3 | 4 | 3 | 4 | 4 | 4 | 4 | 3 |
| levonorgestrel                     | 1 | 1 | 1 |   |   | 1 | 1 | 1 | 1 | 1 |
| levosulpiride                      | 4 | 3 | 3 | 4 | 3 | 4 | 3 | 4 | 3 | 3 |
| limaprost<br>alfadex               | 1 | 1 | 1 | 1 | 1 | 1 | 1 | 1 | 1 | 1 |
| linezolid <sup>c</sup>             | 4 | 3 | 3 | 4 | 3 | 4 | 4 | 4 | 4 | 3 |
| lopinavir                          | 2 | 2 | 2 | 2 | 2 | 2 | 2 | 2 | 2 | 2 |
| loratadine                         | 2 | 2 | 2 | 2 | 2 | 2 | 2 | 2 | 2 | 2 |
| lorazepam <sup>a</sup>             | 1 | 1 | 1 | 1 | 1 | 1 | 2 | 1 | 2 | 2 |
| losartan<br>potassium <sup>d</sup> | 1 | 2 | 2 | 1 | 2 | 1 | 2 | 1 | 2 | 2 |





|                                              |   |   |   |   |   |   |   |   |   |   |
|----------------------------------------------|---|---|---|---|---|---|---|---|---|---|
| pyrantel<br>embonate                         | 2 | 2 | 2 | 2 | 2 | 2 | 2 | 2 | 2 | 2 |
| pyrazinamide                                 | 3 | 3 | 3 | 3 | 3 | 3 | 3 | 3 | 3 | 3 |
| pyridostigmine<br>bromide                    | 3 | 3 | 3 | 3 | 3 | 3 | 3 | 3 | 3 | 3 |
| pyridoxine<br>hydrochloride                  | 3 | 3 | 3 | 3 | 3 | 3 | 3 | 3 | 3 | 3 |
| pyrimethamine<br>raloxifene<br>hydrochloride | 2 | 2 | 2 | 2 | 2 | 2 | 2 | 2 | 2 | 1 |
| ramipril                                     | 1 | 1 | 1 | 1 | 1 | 1 | 1 | 1 | 1 | 1 |
| ranitidine<br>hydrochloride                  | 3 | 3 | 3 | 3 | 3 | 3 | 3 | 3 | 3 | 3 |
| ribavirin                                    | 3 | 3 | 3 | 3 | 3 | 3 | 3 | 3 | 3 | 3 |
| rizatriptan<br>benzoate                      | 3 | 3 | 3 | 3 | 3 | 1 | 1 | 1 | 1 | 1 |
| rosiglitazone<br>maleate                     | 1 | 1 | 2 | 1 | 1 | 1 | 1 | 1 | 1 | 1 |
| sildenafil<br>citrate <sup>d</sup>           | 1 | 2 | 1 | 1 | 2 | 3 | 3 | 3 | 3 | 3 |
| simvastatin                                  | 2 | 2 | 2 | 2 | 2 | 2 | 2 | 2 | 2 | 2 |
| spironolactone <sup>c</sup>                  | 2 | 1 | 1 | 2 | 1 | 2 | 2 | 2 | 2 | 2 |
| stavudine                                    | 3 | 3 | 3 | 3 | 3 | 3 | 3 | 3 | 3 | 3 |
| sulfadiazine                                 | 4 | 4 | 3 | 4 | 4 | 4 | 4 | 4 | 4 | 3 |
| sulfamethoxazol<br>e                         | 4 | 3 | 3 | 4 | 3 | 4 | 4 | 4 | 3 | 3 |
| sultamicillin<br>tosilate                    | 2 | 2 | 2 | 2 | 2 | 4 | 3 | 4 | 3 | 3 |
| sumatriptan<br>succinate                     | 3 | 3 | 3 | 3 | 3 | 3 | 3 | 3 | 3 | 3 |
| tacrolimus <sup>a</sup>                      | 2 | 2 | 2 |   |   | 2 | 2 | 2 | 2 | 2 |



|                                                  |   |   |   |   |   |   |   |   |   |   |
|--------------------------------------------------|---|---|---|---|---|---|---|---|---|---|
| taltirelin hydrate                               | 3 | 3 | 3 | 3 | 3 | 3 | 3 | 3 | 3 | 3 |
| tamoxifen<br>citrate                             | 2 | 2 | 2 | 2 | 2 | 2 | 2 | 2 | 2 | 2 |
| tegafur                                          | 3 | 3 | 3 | 3 | 3 | 3 | 3 | 3 | 3 | 3 |
| telmisartan                                      | 2 | 2 | 2 | 2 | 2 | 2 | 2 | 2 | 2 | 2 |
| temocapril<br>hydrochloride                      | 1 | 1 | 1 | 1 | 1 | 1 | 1 | 1 | 1 | 1 |
| tenofovir<br>disoproxil<br>fumarate <sup>d</sup> | 3 | 4 | 3 | 3 | 4 | 1 | 2 | 3 | 3 | 3 |
| terazosin<br>hydrochloride <sup>d</sup>          | 1 | 2 | 1 | 3 | 3 | 3 | 3 | 3 | 3 | 3 |
| terbinafine<br>hydrochloride <sup>d</sup>        | 1 | 2 | 2 | 1 | 2 | 1 | 2 | 1 | 2 | 2 |
| theophylline                                     | 4 | 4 | 3 | 4 | 4 | 4 | 4 | 4 | 3 | 3 |
| topiramate                                       | 3 | 3 | 3 | 3 | 3 | 3 | 3 | 3 | 3 | 3 |
| toremifene<br>citrate <sup>d</sup>               | 1 | 2 | 2 | 1 | 2 | 1 | 2 | 1 | 2 | 2 |
| triflusal                                        | 2 | 2 | 2 | 2 | 2 | 2 | 2 | 4 | 3 | 3 |
| trimebutin<br>maleate <sup>d</sup>               | 1 | 2 | 2 | 1 | 2 | 1 | 2 | 1 | 1 | 2 |
| trimethoprim <sup>c</sup>                        | 4 | 3 | 3 | 4 | 3 | 4 | 3 | 4 | 3 | 3 |
| tulobuterol<br>hydrochloride                     | 1 | 1 | 1 | 1 | 1 | 1 | 1 | 1 | 1 | 1 |
| ursodeoxycholic<br>acid (ursodiol)               | 2 | 2 | 2 | 2 | 2 | 2 | 2 | 2 | 2 | 2 |
| valsartan                                        | 2 | 2 | 2 | 2 | 2 | 2 | 2 | 2 | 2 | 2 |
| voglibose                                        | 3 | 3 | 3 | 3 | 3 | 3 | 3 | 3 | 3 | 3 |
| warfarin<br>sodium <sup>b</sup>                  | 2 | 1 | 1 | 2 | 1 | 2 | 2 | 2 | 1 | 1 |

|                                   |   |   |   |   |   |   |   |   |   |   |
|-----------------------------------|---|---|---|---|---|---|---|---|---|---|
| zaltoprofen                       | 2 | 2 | 2 | 2 | 2 | 2 | 2 | 2 | 2 | 2 |
| zidovudine                        | 3 | 3 | 3 | 3 | 3 | 3 | 3 | 3 | 3 | 3 |
| zolmitriptan                      | 3 | 3 | 3 | 3 | 3 | 1 | 1 | 1 | 1 | 1 |
| zolpidem<br>tartrate <sup>d</sup> | 1 | 2 | 2 | 1 | 2 | 1 | 2 | 1 | 2 | 2 |

---
